# Supplementary material for: Interaction Study of Oxygen and Iron‐Sulfur Clusters Based on the Density Functional Theory
Source: Hindawi journal article supplement (doi:10.1155/2022/9812188), 2022-01-01
Supplement: f1 [file 9812188.f1.docx]

Interaction study of oxygen and iron-sulfur clusters based on density functional theory

Jiancun Gaoa,b, Hongbin Suia, Siyuan Wua,b[[1]](#footnote-1) , Renyou Zhanga,b, Mengxin Zhanga, Bolun Cuia, Huilin Chua

aSchool of Safety Engineering, Beijing Institute of Petrochemical Technology, Beijing 102617, China

bBeijing Academy of Safety Engineering and Technology, Beijing 102617, China

**DFT Benchmark Calculations**

This work established the structure of Fe4S4 clusters in to investigate the interaction of Fe4S4 clusters with O2 at the GGA/PBE level. To assess the computation accuracy of this study, we ran several experiments on the structure of Fe4S4 clusters. Because Fe4S4 clusters contain transition metal Fe atoms, we apply spin polarization computation to determine whether the system is ferromagnetic or antiferromagnetic by defining the spin direction of each Fe atom, and then find the stable structure of the Fe4S4 ground state. Here μ represent the difference in the number of majority (spin up) and minority electrons ( spin down ). The ground state stable structures obtained are compared to earlier study data.

TABLE 1: Comparison of calculated Fe4S4 cluster structure values with prior study results and experimental values.

| FeS |  | μ(μB) | r(Å) | ω(cm-1) |
| --- | --- | --- | --- | --- |
| 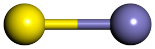 | PBE | 4 | 2.00 | 537 |
| B3LYP | 4 | 2.03 | 415 |
| BP86 | 4 | 2.07 | 508 |
| This work | 4 | 2.01 | 527.5 |
| Exptl work |  | 2.04 | 540 |

The smallest component of iron-sulfur clusters is FeS. Comparative analysis is done on the total magnetic moment, bond length, and vibration frequency of FeS as determined by various functional approaches. Table 1 shows that the total magnetic moments of the FeS structures calculated by different generalized function methods are consistent. The difference between the bond lengths calculated using the PBE generalized function under the projector augmented wave (PAW) method, the B3LYP generalized function, and the PBE generalized function used in this work is not significant, and the difference from the experimental value between 0.01 and 0.04. The bond lengths calculated by the BP86 general function are slightly longer than those measured experimentally. The calculated values of each general function are smaller than the experimental values in the vibration frequency calculation, with the differences between the B3LYP and BP86 general functions and the experimental values being slightly larger, and the vibration frequency values calculated in this work are the least different from the experimental values. Therefore, the calculation method of this work can describe the electronic structure of Fe-S clusters well.

On the basis of this method, we considered different spin states of Fe4S4 and obtained high and low spin states of Fe4S4 clusters, as shown in Figure 1 and Figure 2.


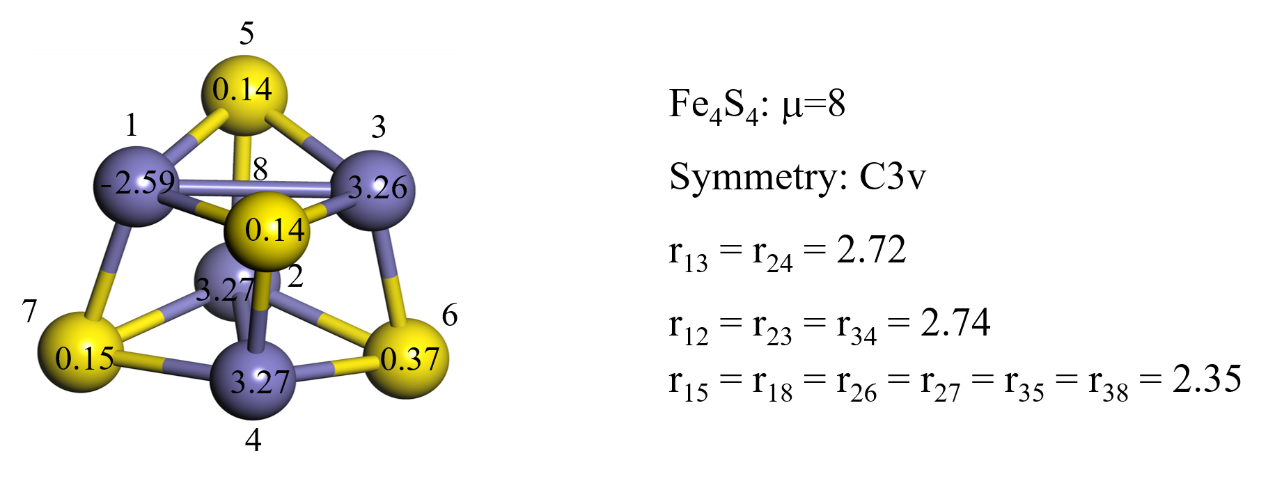


FIGURE 1:The high-spin structure of Fe4S4 clusters established in this study; the local magnetic moment μ is shown in the atomic sphere ( purple represents Fe atom, yellow represents S atom ); total magnetic moment, bond length, and symmetry information are displayed on the right side.


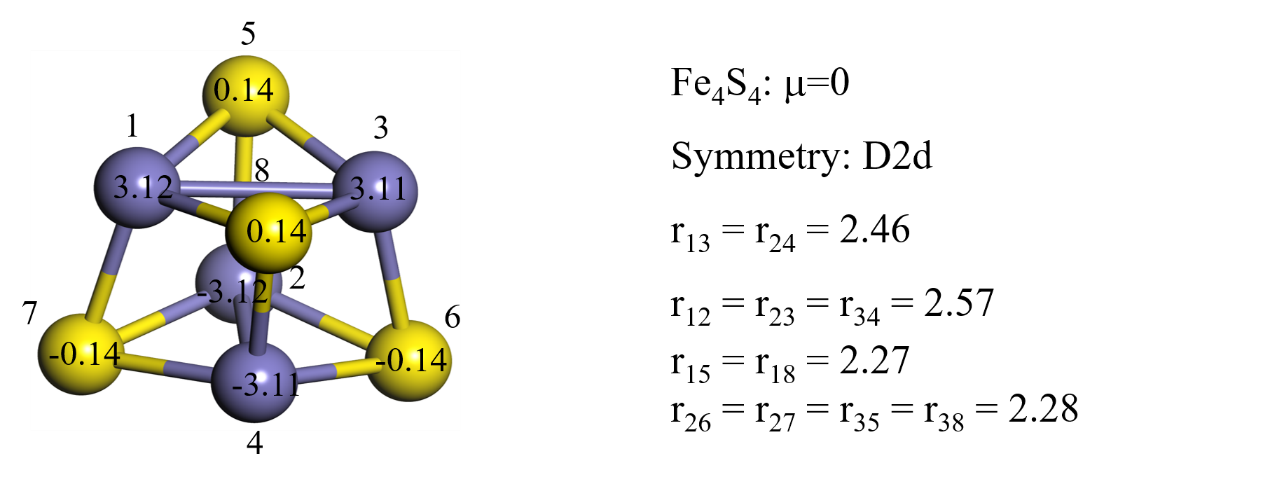


FIGURE 2:The low-spin structure of Fe4S4 clusters established in this study; the local magnetic moment M is shown in the atomic sphere ( purple represents Fe atom, yellow represents S atom ); total magnetic moment, bond length, and symmetry information are displayed on the right side.

The symmetry of the structure in the low spin state is calculated to be D2d, and the symmetry of the system in the high spin state is C3v. In addition, the bond length of the low spin state is slightly different from that of the high spin state, and the energy in the low spin state is 0.2 eV higher than that in the high spin state. Therefore, the ground state structure of Fe4S4 is a high spin state, and the total magnetic moment of the system is 8 μB. We compare the ground state structure of Fe4S4 with previous work. Figure 3 shows the Fe4S4 cluster structure established by F.Amitouche et al. by projector augmented wave (PAW) method at the PBE functional level.


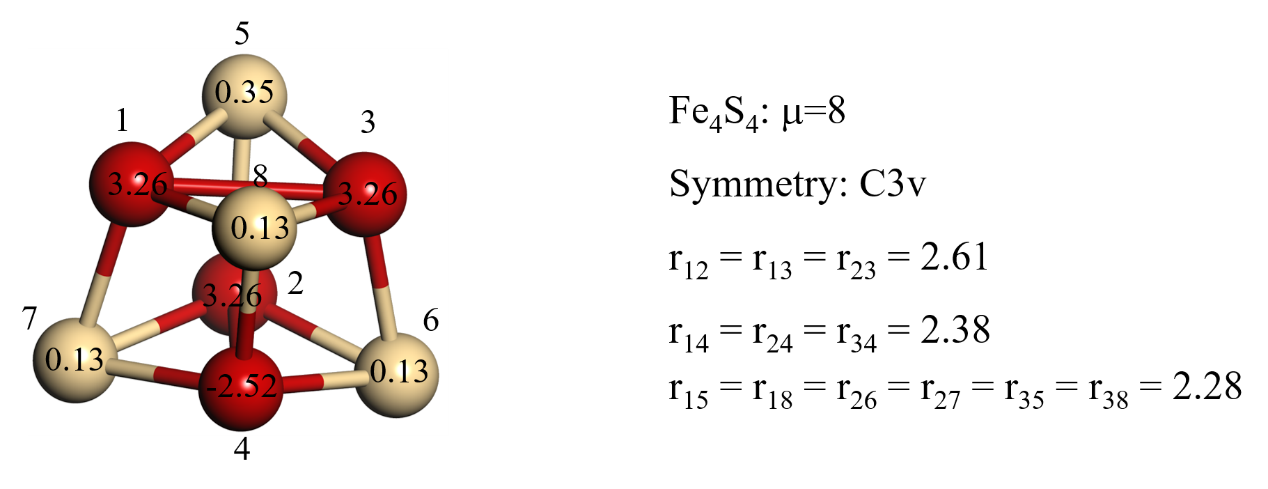


FIGURE 3:The ground state structure of isolated Fe4S4 clusters; the local magnetic moment is shown in the atomic sphere ( red represents Fe atom, brown represents S atom ); total magnetic moment, bond length, and symmetry information are displayed on the right side.

As can be seen in Figure 1 and Figure 3, the local magnetic moments, total magnetic moments, symmetries, and bond lengths of the Fe4S4 cluster structure in this work are in good agreement with the study in the work of F. Amitouche et al.

1. Corresponding authors at School of Safety Engineering, Beijing Institute of Petrochemical Technology, Beijing 102617, China. Fax: +86 010 81292045

   E-mail addresses: wusiyuan@bipt.edu.cn (S. Wu) [↑](#footnote-ref-1)
